1       **Activation of rod input in a model of retinal degeneration reverses**  
2       **retinal remodeling and induces formation of normal synapses,**  
3       **circuitry and visual signaling in the adult retina**

4  
5                   Running title: Visual signaling after retinal remodeling

6  
7                   Tian Wang<sup>1</sup>, Johan Pahlberg<sup>2§</sup>, Jon Cafaro<sup>3§</sup>,  
8                   Alapakkam P. Sampath<sup>2\*</sup>, Greg D. Field<sup>3\*</sup>, and Jeannie Chen<sup>1\*</sup>

9  
10                  Zilkha Neurogenetic Institute, Department of Physiology and Neuroscience, Keck School of  
11                  Medicine, University of Southern California, Los Angeles, CA 90089

12                  Department of Ophthalmology, Stein Eye Institute, University of California, Los Angeles, CA  
13                  90095

14                  Department of Neurobiology, Duke University School of Medicine, Durham, NC, USA

15  
16                  <sup>§</sup>These authors contributed equally to this work

17  
18                  \*Correspondence should be addressed to either A.P. Sampath, G. Field or J. Chen.

19                  Email: [asampath@jsei.ucla.edu](mailto:asampath@jsei.ucla.edu), [field@neuro.duke.edu](mailto:field@neuro.duke.edu), [jeannie@usc.edu](mailto:jeannie@usc.edu)

20  
21  
22  
23                  **Acknowledgements:** This work was supported by National Institute of Health grants EY027193  
24                  (APS, GDF, and JC); EY12155 and EY027387 (JC); an unrestricted grant from Research to  
25                  Prevent Blindness to the Department of Ophthalmology, UCLA; and Jules Stein Eye Institute  
26                  Core Grant EY00331 (APS). We thank Dr. M. Scalabrino for comments on the manuscript, Dr.  
27                  K.Martemyanov for providing the mGluR6 antibody, Dr. C. Craft for providing the cone arrestin  
28                  (ARR3) antibody and Dr. S. Ruffins at the USC microscopy core for his help with confocal  
29                  imaging.

30                  **Conflict of Interest:** The authors declare no competing financial interests.

31  
32                  **Key words:** Neural plasticity, neural transmission, retinal circuitry, retinal degeneration, gene  
33                  therapy, cGMP-gated channel, photoreceptor cell death.

40 **Abstract**

41  
42 A major cause of human blindness is the death of rod photoreceptors. As rods degenerate,  
43 synaptic structures between rod and rod bipolar cells dissolve and the rod bipolar cells extend  
44 their dendrites and occasionally make aberrant contacts. Such changes are broadly observed in  
45 blinding disorders caused by photoreceptor cell death and is thought to occur in response to  
46 deafferentation. How the remodeled retinal circuit affect visual processing following rod rescue  
47 is not known. To address this question, we generated transgenic mice wherein a disrupted  
48 cGMP-gated channel (CNG) gene can be repaired at the endogenous locus and at different  
49 stages of degeneration by tamoxifen-inducible cre-mediated recombination. In normal rods,  
50 light-induced closure of CNG channels leads to hyperpolarization of the cell, reducing  
51 neurotransmitter release at the synapse. Similarly, rods lacking CNG channel exhibit a resting  
52 membrane potential that was ~10mV hyperpolarized compared to WT rods, indicating  
53 diminished glutamate release. Retinas from these mice undergo stereotypic retinal remodeling  
54 as a consequence of rod malfunction and degeneration. Upon tamoxifen-induced expression of  
55 CNG channels, rods recovered their structure and exhibited normal light responses. Moreover,  
56 we show that the adult mouse retina displays a surprising degree of plasticity upon activation of  
57 rod input. Wayward bipolar cell dendrites establish contact with rods to support normal synaptic  
58 transmission, which is propagated to the retinal ganglion cells. These findings demonstrate  
59 remarkable plasticity extending beyond the developmental period and support efforts to repair or  
60 replace defective rods in patients blinded by rod degeneration.

61

62

63 **Significance Statement**

64 Current strategies for treatment of neurodegenerative disorders are focused on the repair of the  
65 primary affected cell type. However, the defective neuron functions within a complex neural  
66 circuitry, which also becomes degraded during disease. It is not known whether a rescued  
67 neuron and the remodeled circuit will establish communication to regain normal function. We  
68 show that the adult mammalian neural retina exhibits a surprising degree of plasticity following  
69 rescue of rod photoreceptors. The wayward rod bipolar cell dendrites re-establish contact with  
70 rods to support normal synaptic transmission, which is propagated to the retinal ganglion cells.  
71 These findings support efforts to repair or replace defective rods in patients blinded by rod cell  
72 loss.

73

74

## 75 Introduction

76

77 Diseases that afflict sensory systems typically result from deficiencies within the sensory  
78 receptor cells themselves, either within sensory transduction or synaptic transmission  
79 (Bermingham-McDonogh and Reh, 2011). Deficits in visual processing are no exception, with  
80 the majority of blinding diseases resulting from the dysfunction or death of the primary input  
81 cells, the retinal rod and cone photoreceptors (Quartilho et al., 2016). Synaptic remodeling of  
82 retinal circuits, in particular between photoreceptor cells and their downstream neurons, occur  
83 early in retinal degeneration (Soto and Kerschensteiner, 2015). Remodeling of bipolar and  
84 horizontal cell dendrites is thought to occur in response to deafferentation (Marc and Jones,  
85 2003). Changes that occur include homeostatic down-regulation of synaptic structures,  
86 exuberant extension of dendritic processes which sometimes contact off-target sites (Marc and  
87 Jones, 2003; Puthussery and Taylor, 2010), and even switching of post-synaptic receptor types  
88 from mGluR to iGluR expression (Chua et al., 2009). In genetically inherited forms of retinal  
89 degeneration, synaptic changes may already occur during a critical period of retinal  
90 development. It is not known how these changes in retinal circuitry may ultimately limit recovery  
91 of normal vision, although several approaches are being implemented to rescue dying  
92 photoreceptors using gene therapy, or replace them with stem cells (Scholl et al., 2016; Garg et  
93 al., 2017; Yao et al., 2018). To address this gap in knowledge, this study focuses on cellular  
94 plasticity in retinal circuits of young adult mice with rod degeneration, and how the synaptic  
95 structures and circuits that receive rod input respond to rod rescue.

96 We genetically engineered a mouse line in which rod function can be uniformly rescued  
97 via tamoxifen-induced cre-mediated recombination. The line was generated to lack expression  
98 of the cyclic nucleotide gated (CNG) channel beta-1 subunit (CNGB1) due to an insertion of a  
99 neomycin cassette at the endogenous gene to disrupt expression (Wang and Chen, 2014;  
100 Wang et al., 2017a). This mouse model recapitulates the effects of mutations in human *CNGB1*  
101 and *CNGA1* genes that cause autosomal recessive retinitis pigmentosa (Biel and Michalakis,  
102 2007). Without the CNGB1 subunit, the CNG channels in rod outer segments fail to form  
103 normally functioning channels, which leads to a slow form of rod death that occurs over 4-6  
104 months (Zhang et al., 2009; Wang et al., 2017a), or longer (Hüttl et al., 2005). Importantly, the  
105 neomycin cassette is flanked by loxP sites, which allows for cre-mediated excision and the  
106 expression of CNGB1 from the endogenous locus. Thus, this mouse line provides an  
107 opportunity to introduce precisely a 'cure' for the underlying genetic defect at different time  
108 points during degeneration.

109 We use this novel mouse line to determine the extent to which activating rod input in the  
110 degenerating retina allows recovery of the structure and function of well-defined rod-driven  
111 retinal circuits in young adult mice. The lack of CNG channels caused stereotypic degenerative  
112 changes in the retina that included rhodopsin mislocalization, activation of Müller glia, and a  
113 reduction of pre- and post-synaptic proteins between rods and rod bipolar cells by as early as 4  
114 weeks of age. Signal transmission from rods to rod bipolar cells was abrogated and sensitivity of  
115 retinal ganglion cells (RGCs) was reduced ~100-fold. Tamoxifen-induced restoration of CNG  
116 channel expression initiated at 4 weeks of age led to an expected recovery of rod photoreceptor  
117 function. Importantly, we show that initiation of rod input in the deafferented adult retina also  
118 induced a high degree of structural plasticity between rods and their primary postsynaptic  
119 partner, rod (ON) bipolar cells. Specifically, rod bipolar cell dendrites sprouted fine tips and  
120 mGluR6 clusters formed on these tips which made new synapses with rods. This structural  
121 transformation resulted in near-normal light responses in both bipolar cells and retinal ganglion  
122 cells, the output neurons of the retina. Our findings indicate substantial plasticity in the adult  
123 mammalian retina, suggesting favorable outcomes for interventions targeting the rescue of  
124 dysfunctional rods from death.

125

## 126 **Materials and Methods**

127 **Generation of transgenic mice.** The use of mice in these experiments was in accordance with  
128 the National Institutes of Health guidelines and the Institutional Animal Care and Use Committee  
129 of our respective universities. Targeting of the neoloxP to the *Cngb1* locus in mouse embryonic  
130 stem cells and generation of transgenic mice from verified stem cell clones were described  
131 previously (Chen et al., 2010). The CAGGCre-ER<sup>TM</sup> transgenic line, Tg(CAG-cre/Esr1\*)5Amc/J,  
132 was obtained from the Jackson Laboratory and crossed with *Cngb1*<sup>neo/neo</sup> mice.

133

134 **Tamoxifen treatment.** One-hundred mg tamoxifen was dissolved in 500 µl 95% ethanol and  
135 diluted with 4.5 ml corn oil to give final concentration of 20 mg/ml. Four-week-old cre-positive  
136 were given a dose of 3 mg/25 g body weight by oral gavage for 4 or 7 consecutive days. In  
137 control experiments shown in Fig. 1, some cre-negative mice did not receive tamoxifen. For all  
138 other experiments, cre-negative littermate mice were also treated with tamoxifen to control for  
139 the possible effect of tamoxifen on photoreceptor cell survival (Wang et al., 2017b).

140

141 **PCR genotyping.** Genomic DNA was isolated from the neural retina. Three PCR primers were  
142 used to detect the presence or absence of the neoloxP cassette. Primer 1 sequence

143 (GTTTTATGTAGCAGAGCAGGGAC) is located on intron 19, primer 2 sequence  
144 (GAGGAGTAGAAGGTGGCGC) is on neoloxP, and primer 3 sequence  
145 (CCACTCCTTAGTACATACCTAAGC) is located on exon 20. Product size of 620 bp from  
146 primer pairs (2+3) indicates the presence of neoloxP, and a 802 bp PCR band from primer pairs  
147 (1+3) indicates the absence of the neoloxP insert.

148

149 **Retinal morphology.** Mice were rendered unconscious by isofluorane inhalation and  
150 immediately followed by cervical dislocation. Retinal sections were prepared as previously  
151 described (Concepcion and Chen, 2010; Wang and Chen, 2014). Briefly, before enucleation,  
152 eyes were marked for orientation by cauterization on the superior aspect of the cornea. Eyes  
153 were placed in ½ Karnovsky buffer (2.5% glutaraldehyde, 2% formaldehyde in 0.1 M cacodylate  
154 buffer, pH 7.2). The cornea and lens were removed, and the remaining eyecup was further fixed  
155 overnight. Fixed eyes were rinsed in 0.1 M cacodylate buffer, fixed for 1 h in 1% OsO<sub>4</sub>,  
156 dehydrated in graded EtOH and embedded in epoxy resin. Eyecups were hemi-sectioned along the  
157 superior-inferior axis, and one μm sections along the central meridian were obtained for light  
158 micrographs.

159 **Immunocytochemistry.** Eyecups were prepared as described above, except the tissues were  
160 dissected in cold 4% formaldehyde in PBS and further fixed for 15 min on ice. For frozen  
161 sections, eyecups were rinsed in cold PBS, placed in 30% sucrose for 1 h, embedded in Tissue-  
162 Tek® O.C.T. Compound (Sakura® Finetek) and flash frozen in liquid N<sub>2</sub>. Ten μm frozen  
163 sections were obtained. For retinal flat mounts, four relaxing cuts (0°, 90°, 180°, 270°) were  
164 made on the edge of the neural retina and the flattened tissue was immobilized on a piece of  
165 nitrocellulose membrane (Whatman®, GE Healthcare Life Sciences), photoreceptor side down,  
166 as described (Anastassov et al., 2017). The tissues were incubated with the following  
167 antibodies: rhodopsin 1D4 (generously provided by R. Molday), GFAP (AB5804, Millipore),  
168 CtBP2 (612044, BD Biosciences), PKC (ab32376, Abcam), mGluR6 (generously provided by K.  
169 Martemyanov), ARR3 (generously provided by C. Craft). Images were acquired on a Zeiss  
170 LSM800 confocal microscope. For quantifications of mGluR6 puncta, images were imported into  
171 Fiji (ImageJ2), adjusted to similar threshold and the number and areas of puncta were quantified  
172 using the analyze particles function.

173 **Western blots.** Each isolated retina was homogenized in 150  $\mu$ l buffer (150mM NaCl, 50mM  
174 Tris pH 8.0, 0.1% NP-40, 0.5% deoxycholic acid, 0.1 mM PMSF and complete mini protease  
175 inhibitor (Roche Applied Sciences), incubated with DNase I (30U, Roche Applied Sciences) at  
176 room temperature for 30 min. An equal amount of retinal homogenate from each sample was  
177 electrophoresed on 4-12% Bis-Tris SDS-PAGE Gel (Invitrogen). Protein was transferred onto  
178 nitrocellulose membrane (Whatman<sup>®</sup>, GE Healthcare Life Sciences) and incubated overnight  
179 with the following primary antibodies: rabbit anti-PDE polyclonal antibody (PAB-06800,  
180 Cytosignal), rabbit anti-ROS-GC1 polyclonal antibody (sc50512, Santa Cruz), mouse Anti-G $\alpha$   
181 antibody (371740, EMD4Biosciences), rabbit polyclonal anti-GCAP1 and GCAP2 antibodies  
182 (Hoyo et al., 2014; Wang and Chen, 2014), mouse anti-CNGB1 4B1 antibody (Poetsch et al.,  
183 2001), mouse anti-CNG $\alpha$  antibody PMc 1D1 (Cook et al., 1989), mouse NCKX1 8H6 antibody  
184 (Vinberg et al., 2015) and mouse anti-Actin antibody (MAB1501, Millipore). The membranes  
185 were then incubated with fluorescently labeled secondary antibodies (1:10,000, LI-COR  
186 biosciences, 926-31081) at room temperature for 1 hour and detected by Odyssey infrared  
187 imaging system.

188

189 **Whole retina and single-cell recordings from rods and bipolar cells.** Mice were maintained  
190 on a normal 12-hour day-night cycle and were dark-adapted overnight (>12-h) prior to  
191 experiments. All further manipulations were performed in total darkness under infrared  
192 illumination visualized with infrared image converters (BE Meyers, WA). Following euthanasia,  
193 eyes were enucleated, the lens and cornea were removed, and eyecups were stored in  
194 darkness at 32°C in Ames' media buffered with sodium bicarbonate (Sigma, Cat# A1420)  
195 equilibrated with 5% CO<sub>2</sub>/ 95% O<sub>2</sub>.

196 *Trans*-retinal electroretinograms (ERGs) were recorded from isolated retinas as  
197 described previously (Pahlberg et al., 2017). Retinas were mounted photoreceptor side-up over  
198 a machined hole in a recording chamber. The tissue was superfused in darkness with 35-37°C  
199 Ames' media buffered with sodium bicarbonate and equilibrated with 5% CO<sub>2</sub>/ 95% O<sub>2</sub> (pH ~  
200 7.4). An additional 10 mM of BaCl was added to the solution facing the inner retina to mitigate  
201 Müller cell activity. The *trans*-retinal potential change to flashes of light, delivered from a  
202 standard light bench, was measured using Ag/AgCl half-cells connected to a differential  
203 amplifier (Model DP-311; Warner Instruments). Recordings were sampled at 1 kHz and low-  
204 pass filtered at 30 Hz.

205 Recordings of the photovoltage from individual rods and rod bipolar cells was made by  
206 whole-cell patch clamp from dark-adapted retinal slices as described previously (Pahlberg et al.,

207 2017). Briefly, a small piece of dark-adapted retina was embedded in low-gelling temperature  
208 agar, slices were cut on a vibrating microtome, transferred into a recording chamber, and  
209 superfused with Ames' media equilibrated with 5%CO<sub>2</sub>/95%O<sub>2</sub> while maintained at 35-37°C.  
210 The pipette internal solution consisted of (in mM): 125 K-Aspartate, 10 KCl, 10 HEPES, 5 N-  
211 methyl glucamine-HEDTA, 0.5 CaCl<sub>2</sub>, 1 ATP-Mg, 0.2 GTP-Mg; pH was adjusted to 7.2 with N-  
212 methyl glucamine hydroxide. Light-evoked responses were recorded following the delivery of 10  
213 ms flashes from a blue LED ( $\lambda_{\text{max}} \sim 470$  nm, full width half maximum  $\sim 30$  nm) whose strength  
214 varied from producing a just-measurable response, and increased by factors of 2. Recordings  
215 were sampled at 1 kHz and low-pass filtered at 300 Hz.

216

### 217 **Retinal ganglion cell recording, stimulation and analysis**

218 Retinal ganglion cells were recorded from dorsal retina using a large scale, dense  
219 hexagonal multi-electrode array covering  $\sim 0.34\text{mm}^2$  of the retina (MEA, (Field et al., 2010) 519  
220 electrodes with 30  $\mu\text{m}$  spacing). The pigmented epithelium remained attached to the retina for  
221 these recordings. The retina was perfused with Ames' solution (30-31°C) bubbled with 95/5%  
222 O<sub>2</sub>/CO<sub>2</sub>. Spikes were identified and assigned to specific RGCs on the MEA as previously  
223 described (Yu et al., 2017). Dim flashes were delivered at 3 s intervals using a 490 nm LED.  
224 Light intensity was controlled using pulse duration, 2-8 ms, and neutral density filters. Dim flash  
225 responses were measured by counting spikes on each trial within a 100 ms window that was  
226 centered on the peak of the peristimulus time histogram.

### 227 **Experimental design and statistical analyses**

228 Because our initial studies did not show gender-specific differences, the genders were  
229 pooled. RGC response thresholds were measured from three *Cngb1* $\Delta$ *CaM* retinas (102-232  
230 cells), five *Cngb1*<sup>neo/neo</sup> retinas (100-336 cells) and three *Cngb1*<sup>neo/neo</sup> rescue retinas (53-186  
231 cells). Cumulative threshold histograms were calculated in each tissue and averaged across all  
232 retinas within a condition. A two tailed Kolmogorov-Smirnov goodness-of-fit hypothesis test was  
233 used to assess the statistical difference between average cumulative histograms. The fraction  
234 of cells for which no response surpassed threshold was also measured in each recorded retina.  
235 A two sample t-test was used to evaluate significance between conditions.

236

237

238

## 239 Results

240

### 241 **Generation of a novel animal model of genetically reversible rod degeneration**

242 One challenge to identifying how plasticity among inner retinal neurons impacts  
243 functional recovery is the lack of an experimental system that is non-invasive and allows for  
244 stringent regulation of the timing and uniformity of rescue. For example, viral-mediated (gene  
245 therapy) approaches for treating rod dysfunction and death (1) take weeks for expression to  
246 occur; (2) they do not infect all targeted cells; (3) they may not drive proper protein expression  
247 levels; (4) and the subretinal injections used for viral delivery can damage the retina. A  
248 systematic investigation into the consequences of rod degeneration and subsequent rescue of  
249 the retinal circuitry requires an experimental system wherein both events occur uniformly in the  
250 retina. Towards this goal, a neoloxP cassette was inserted into intron 19 of the *Cngb1* gene by  
251 homologous recombination in mouse embryonic stem cells (Fig. 1A). Mice harboring this  
252 insertion were subsequently derived (*Cngb1<sup>neo/neo</sup>*). The presence of the cassette disrupted a  
253 splice site and prevented CNGB1 expression (Fig. 1B). Expression of CNGB1 was also  
254 substantially attenuated (Fig. 1B), a phenomenon attributed to mis-trafficking (Hüttl et al., 2005)  
255 and structural stability conferred by association of both subunits. The expression levels of other  
256 major phototransduction proteins were minimally perturbed in retinas of 1-month old (1 MO)  
257 mice (Fig. 1B, NCKX1, GC1, PDE6A, and GNAT1). Consistent with previous reports on  
258 conventional *Cngb1* knockout mice (Hüttl et al., 2005; Zhang et al., 2009), the lack of CNG  
259 channel expression led to a progressive thinning of the outer nuclear layer over the course of 6  
260 months (Fig. 1C). At two-weeks, the outer nuclear layer (ONL) containing primarily rod  
261 photoreceptor cell nuclei reached its maximum thickness. This thickness was reduced by ~20%  
262 in 1 MO mice and to ~50% in 2 MO mice. By 6 MO, the ONL was absent. Thus, these mice  
263 exhibit slow rod degeneration relative to other commonly used models of rod degenerative  
264 diseases, such as *rd1* (Farber and Lolley, 1974) and *rd10* mice (Chang et al., 2007).

265 As expected, the absence of the CNGB1 recapitulated the stereotypic sequence of  
266 events associated with rod degeneration (Marc and Jones, 2003; Puthusseray and Taylor, 2010;  
267 Soto and Kerschensteiner, 2015). For example, rhodopsin mislocalization and activation of  
268 Müller glia were observed in 4-week old *Cngb1<sup>neo/neo</sup>* mice (Fig. 1, compare F, G with control  
269 retina, D and E).

270 We also observed in *Cngb1<sup>neo/neo</sup>* mice that synaptic contacts between rods and rod  
271 bipolar cells were structurally abnormal. Immunohistochemistry using a marker for the  
272 presynaptic ribbon protein CtBP2 (ribeye) and the post-synaptic glutamate receptor, mGluR6,



273 revealed clear differences between *Cngb1<sup>neo/neo</sup>* and control retinas. In control retinas, these  
274 structures were closely apposed, and both were contained within a well-defined outer plexiform  
275 layer (Fig. 1H, OPL). However, in *Cngb1<sup>neo/neo</sup>* retinas these structures were more dispersed,  
276 with synaptic ribbons retracted from rod spherules and some were situated deep into the  
277 photoreceptor nuclear layer (ONL, Fig. 1I, arrows). The ultrastructure of rod synapses was  
278 further evaluated by transmission electron microscopy (TEM, Fig. 1J and K). A normal rod  
279 spherule (blue) contains a single large mitochondria (yellow) and encompasses a synaptic triad  
280 consisting of a single ribbon (red) along with horizontal (orange) and rod bipolar cell (green)  
281 processes. The majority of imaged rod spherules from control retinas exhibited this structure.  
282 Dyads were also frequently observed when one or another component was out of the plane of  
283 the TEM section. Of the 27 fields taken from 4 control C57 retinas, 122 synapses were counted  
284 (4.5 synapses per field) wherein 64% were triads and 36% were dyads. However, in 1 MO  
285 *Cngb1<sup>neo/neo</sup>* retinas, the frequency of observing synapses and triadic structures were both  
286 reduced (Fig. 1K). Of 31 TEM fields taken from 4 *Cngb1<sup>neo/neo</sup>* retinas, 64 synapses were  
287 counted (2.1 synapses per field) wherein only 22% were triads and 78% of were dyads. Note, at  
288 1 MO, only 20% of rods had died, yet there was >50% reduction in contacts between rods and  
289 rod bipolar cells. Furthermore the contacts that persisted were largely abnormal in structure.  
290 These results demonstrate that *Cngb1<sup>neo/neo</sup>* mice exhibit stereotypic slow rod degeneration and  
291 that synaptic structures between rods and rod bipolar cells were disrupted.

292

### 293 **Lack of CNGB1 expression attenuated rod photoresponses and eliminated rod bipolar** 294 **cell light responses.**

295 Previous work has indicated that lack of CNGB1 expression compromises rod vision  
296 (Biel and Michalakis, 2007). To verify compromised rod function in *Cngb1<sup>neo/neo</sup>* mice, we  
297 performed *ex vivo* whole-retina electroretinograms (ERG) under scotopic conditions. The ERG  
298 reflects the averaged activity across all retinal neurons (Granit, 1933). ERGs from C57 retinas  
299 exhibited a well characterized biphasic response (Fig 2A; see also (Saszik et al., 2002)) with the  
300 initial negative-voltage deflection (a-wave) indicative of the rod hyperpolarization to the flash  
301 stimulus, and the subsequent positive-voltage rebound indicative of predominantly the rod  
302 bipolar cell depolarization. Recordings were also performed on control *Cngb1 $\Delta$ CaM* mice in  
303 which the calmodulin binding site was removed (Chen et al., 2010). No differences were  
304 observed between *Cngb1 $\Delta$ CaM* and C57 retinas (data not shown).

305 ERGs from 1 MO *Cngb1<sup>neo/neo</sup>* retinas exhibit a diminished scotopic a-wave with reduced  
306 sensitivity (Fig. 2B), indicating minimal rod signaling without CNGB1 expression. The light

307 response is not fully eliminated in these rods; this is likely due to residual activation of  
308 homomeric channels composed of CNGA1 (see Discussion). Furthermore, ERGs from  
309 *Cngb1<sup>neo/neo</sup>* retinas did not exhibit a b-wave under scotopic conditions, indicating a lack of  
310 measurable rod-to-rod bipolar signal transmission at this gross level. This observation  
311 complements the abnormal synaptic structures observed between rods and rod bipolar cells via  
312 light and electron microscopy. Together, these results indicate that synaptic transmission  
313 between rods and rod bipolar cells is severely dysfunctional in *Cngb1<sup>neo/neo</sup>* mice. Thus, we  
314 sought to determine the extent to which normal synaptic structures and transmission between  
315 rods and rod bipolar cells could be recovered by the rescue of CNGB1 expression in mature  
316 retinas.

317

### 318 ***Cre-mediated excision of the NeoLoxP cassette leads to normal CNGB1 expression.***

319 To activate CNGB1 expression in the the *Cngb1<sup>neo/neo</sup>* retina, we utilized the CAGGCre-  
320 ER<sup>TM</sup> transgene (Hayashi and McMahon, 2002) to enable tamoxifen-dependent, cre-mediated  
321 excision of the NeoloxP cassette. We previously demonstrated that mice derived from germline  
322 excision of this cassette exhibit normal retinal morphology with a uniform and normal expression  
323 level of CNGB1 (Chen et al., 2010). The homologous recombination strategy that introduced  
324 the NeoloxP cassette also removed a stretch of 14 amino acids that encompassed the  
325 calmodulin binding domain on CNGB1 (Grunwald et al., 1998). Importantly, rods that expressed  
326 CNGB1 $\Delta$ CaM exhibited normal light responses as mentioned above (see also (Chen et al.,  
327 2010)). We hypothesize that utilizing the CAGGCre-ER<sup>TM</sup> transgene would provide temporal  
328 control over expression of the functional CNG channel. To determine the efficacy of cre-  
329 mediated excision of the neoloxP cassette, four-week-old cre-positive and cre-negative  
330 *Cngb1<sup>neo/neo</sup>* littermate mice were divided into two groups. One group was given tamoxifen for  
331 four-consecutive days by oral gavage, and the other group did not receive drug treatment.

332 A PCR strategy was designed to detect the extent of neoloxP excision in genomic DNA  
333 extracted from isolated retinas: the primer pair (2+3) detects the presence of the neoloxP insert,  
334 whereas primer pair (1+3) gives rise to a diagnostic band when the large neoloxP insert is  
335 excised (Fig. 3A). After four-consecutive days of tamoxifen treatment, both sets of primers  
336 produced positive bands. This result indicates a mixed population of cells at this stage, some of  
337 which have undergone excision while others have not. However, when tamoxifen treatment was  
338 given for seven-consecutive days a positive signal was detected only by primers (1+3). This  
339 result indicates that following a 7-day tamoxifen treatment, most, if not all cells have undergone

340 neoloxP excision (Fig. 3A, bottom panels). Thus a 7-day treatment was used for further  
341 structural and functional studies.

342 To assess the level of protein expression at 6- or 8-weeks (corresponding to 1 or 3  
343 weeks after drug treatment), Western blots were prepared from whole retinal homogenates from  
344 both cohorts (Fig. 3B). Expression of CNGB1 protein was observed only in tamoxifen-treated,  
345 cre-positive mice. No expression was observed in cre-positive mice without drug treatment,  
346 indicating a lack of basal recombinase activity. We next examined how excision of the neoloxP  
347 insert affected the expression of CNGB1 and other major phototransduction proteins. We found  
348 that following neoloxP excision, there was a striking increase in CNGB1 expression (Fig. 3C).  
349 There was also an increase in the detected levels of other phototransduction proteins GC1,  
350 PDE6A, GNAT1, and GCAP2 (Fig 3C). To determine if this is due to rod rescue, cre-negative  
351 and cre-positive *Cngb1<sup>neo/neo</sup>* littermate mice were administered tamoxifen for 7 consecutive  
352 days beginning at 4-weeks, and retinal sections were prepared from 3 MO mice (Fig. 3D and  
353 3E). The ONL thickness was greater in cre-positive mice when compare to that from the cre-  
354 negative sibling mice, and the rod outer segment structure was organized and of normal length.  
355 Expression of CNGB1 exhibited a long term rescuing effect on rod survival (Fig. 3F and 3G,  
356 tamoxifen was administered for 4 consecutive days starting at P28), consistent with a previous  
357 report on AAV-mediated *Cngb1* gene replacement therapy (Koch et al., 2012). In sum, these  
358 data show that the *Cngb1<sup>neo/neo</sup>* mice allowed us to regulate the expression of CNGB1 from the  
359 endogenous locus in a temporally-controlled manner. Further, this excision is nearly complete  
360 with a 7-day tamoxifen treatment and that upon expression of CNGB1, the rods exhibit normal  
361 morphology and are stably rescued from cell death.

362 We measured the responsiveness of rod photoreceptors following drug treatment in  
363 patch-clamp recordings from individual rods in retinal slices. In voltage-clamp ( $V_m = -40$  mV),  
364 rods from 1 MO *Cngb1<sup>neo/neo</sup>* mice displayed diminished response amplitudes (~6-fold) and a  
365 ~10-fold reduction in light sensitivity (Fig. 4A), a result consistent with the diminished a-wave in  
366 *ex vivo* ERG recordings (Fig. 2B). In current-clamp ( $i = 0$ ), *Cngb1<sup>neo/neo</sup>* rods exhibit a resting  
367 membrane potential that was ~10 mV hyperpolarized compared to WT rods ( $-47 \pm 1.3$  mV (5)  
368 vs.  $-37 \pm 2.3$  mV (6), mean  $\pm$  SEM). These results are consistent with reduced CNG channel  
369 expression (see Discussion) and indicate reduced glutamate release in darkness. However,  
370 rods from tamoxifen treated *Cngb1<sup>neo/neo</sup>* mice displayed responses with characteristics very  
371 similar to C57 mice (Fig. 4B), consistent with near-normal function and rescue of the  
372 photoreceptor layer (Fig. 3).

373

374 ***Expression of CNGB1 induces normal synaptic structures between rods and rod bipolar***  
375 ***cells.***

376           Given that tamoxifen administration in *Cngb1<sup>neo/neo</sup>* mice rescued rods from death (Fig.  
377 3E) and rescued normal rod light responses (Fig. 4), we next examined the synaptic contacts  
378 between rods and rod bipolar cells to determine how rod rescue impacts these structures.  
379 Tamoxifen treatment was initiated at 4-weeks for 7 consecutive days, and retinal structure was  
380 examined at 3M. Comparisons were made between 1 MO C57 and *Cngb1<sup>neo/neo</sup>* mice and 3 MO  
381 tamoxifen-treated mice to examine the effect of rod rescue that was initiated at 1M. Synaptic  
382 structures were labeled in retinal flat mounts stained for the presynaptic ribbon synapse protein  
383 (CtBP2, blue) and postsynaptic mGluR6 (orange, Fig. 5A, 5D and 5G). To distinguish between  
384 rod and cone synapses, cone pedicles were further labeled with the cone arrestin antibody  
385 (ARR3, green). Rod bipolar cell morphology, visualized by PKC $\alpha$  staining, and the mGluR6  
386 puncta that decorate their dendritic tips are shown in retinal cross sections (Fig. 5B, 5E and 5H).

387           Control retinas (C57), exhibited a close juxtaposition between the rod's single ribbon and  
388 the mGluR6 puncta on the dendritic tips of rod bipolar cells (Fig. 5A and 5B; Fig. 1G). However,  
389 in *Cngb1<sup>neo/neo</sup>* retinas from 1 MO mice, both the number of synaptic ribbons and mGluR6  
390 puncta were reduced (Fig. 5D). Rod bipolar cell dendrites were also unevenly distributed in  
391 *Cngb1<sup>neo/neo</sup>* retinas, and the size of the mGluR6 puncta appeared smaller and less uniform in  
392 shape (Fig. 5E and Fig. 1H). In contrast, retinas from the tamoxifen-treated, cre-positive  
393 littermates exhibited robust staining of synaptic ribbons along with their associated mGluR6  
394 puncta (Fig. 5G). Furthermore, rod bipolar cell dendrites were evenly extended and the  
395 mGluR6 puncta were larger in size and appeared more uniform in shape (Fig. 5H). To quantify  
396 these changes, the number and size of mGluR6 puncta were measured (Fig. 5C, 5F and 5I).  
397 For the C57 retina, mGluR6 puncta size of 20- to 30-unit area were the most numerous,  
398 whereas in *Cngb1<sup>neo/neo</sup>* retinas smaller size puncta were more frequent (compare Fig. 5C and  
399 5F). The distribution shifted back to larger puncta sizes in the tamoxifen-treated mice (Fig. 5I).  
400 These results indicate that inducing expression of CNGB1 in mature retina causes a recovery of  
401 synaptic structures between rods and rod bipolar cells.

402  
403 ***Rescue of CNGB1 expression in mature retina recovers rod bipolar light responses.***

404           The results above indicate a structural recovery of synapses following expression of  
405 CNGB1. In addition to this structural recovery, *ex vivo* whole-retina ERGs revealed a recovery  
406 of the rod bipolar cell-driven b-wave with amplitudes similar to control retinas (Fig. 6A). Thus,  
407 structural and functional measures broadly indicate recovery of synaptic function between rods

408 and rod bipolar cells. To examine further synaptic function before and following rod rescue, we  
409 performed patch clamp recordings from rod bipolar cells in retinal slices. In untreated  
410 *Cngb1<sup>neo/neo</sup>* mice there was a complete absence of functional transmission of between rods and  
411 rod bipolar cells (Fig. 6C); 1 MO *Cngb1<sup>neo/neo</sup>* rod bipolar cells never yielded light-evoked  
412 responses (n=15 from 5 retinas), a result consistent with a lack of b-wave in *ex vivo* ERG  
413 recordings which represent mass-action of largely rod bipolar cells (Fig. 2B). However, in  
414 *Cngb1<sup>neo/neo</sup>* mice administered tamoxifen for 7 days at 4 weeks of age and recorded at 3 MO,  
415 rod bipolar cells exhibited robust light-evoked responses similar to control animals (Fig. 6D).  
416 The extent of functional recovery in rod bipolar cells was characterized in plots of the response  
417 amplitude versus the flash strength. These intensity-response relationships were fit with a Hill  
418 curve and compared quantitatively to control responses. The half-maximal flash strength ( $I_{1/2}$ )  
419 increased by ~2-fold in rescued animals (Fig. 6E), consistent with some rod loss (see  
420 Discussion). However, other features of the rod bipolar light response that are critical for  
421 function near visual threshold had recovered to near control values. For example, the Hill  
422 exponent for the fit of the response-intensity relationship matched that in control, indicating a  
423 similar nonlinear relationship between the flash strength and the response amplitude. The  
424 extent of nonlinearity reflects the rate of glutamate release from rod synapses (Sampath and  
425 Rieke, 2004). In addition, the time course of rod bipolar cell responses was similar in rescued  
426 animals (Fig. 6A, 6C, 6E – dashed line), further indicating the anatomical and physiological  
427 recovery of synaptic transmission in tamoxifen-treated animals. These results indicate that  
428 rescuing rod function in the mature mouse retina produces a cascade of structural and  
429 functional recovery in synaptic transmission between rods and rod bipolar cells, and thus the  
430 primary rod pathway (Dacheux and Raviola, 1986).

431

### 432 **Rescuing rods recovers absolute sensitivity of retinal output**

433 Retinal ganglion cells (RGCs) provide the sole output from the retina and can integrate  
434 input from thousands of rods, making them the most light-sensitive cells in the retina  
435 (Chichilnisky and Rieke, 2005; Field and Sampath, 2017). RGC sensitivity relies on functioning  
436 photoreceptors and highly tuned synaptic connections via the primary rod pathway (Field and  
437 Rieke, 2002; Sampath and Rieke, 2004). To understand how rescuing rod function in the 1 MO  
438 *Cngb1<sup>neo/neo</sup>* retina impacts RGC sensitivity, we used a large-scale multi-electrode array (MEA)  
439 to record spikes from hundreds of RGCs. We tested the sensitivity of the RGCs by stimulating  
440 the retina with brief, dim flashes (0.001-10 Rh\*/rod) and compared RGC responses in 3 MO  
441 control *Cngb1 $\Delta$ CaM*, *Cngb1<sup>neo/neo</sup>*, and 4-5 MO *Cngb1* tamoxifen rescued mice. Flashes

442 producing less than 1 isomerization per rod faithfully produced spike rate modulations in many  
443 RGCs from control mice (Fig 7A shows an example cell). The same flash intensities did not  
444 reliably modulate the spike output of most RGCs in retinas from 3 MO old *Cngb1<sup>neo/neo</sup>* mice (Fig  
445 7B shows an example cell). Indeed, most RGCs from *Cngb1<sup>neo/neo</sup>* mice did not show reliable  
446 responses until flash intensities exceeded 1 Rh\*/rod (Fig 7B<sub>3</sub>). However, similar to the control  
447 retinas, RGC responses were often evident at low flash intensities in 4-5 MO *Cngb1* rescued  
448 mice (Fig 7C shows an example cell). These example cells suggest that rod and circuit  
449 functionality are broadly and stably rescued in some RGCs for *Cngb1* rescued mice.

450 To measure the extent that sensitivity across the RGC population recovered in *Cngb1*  
451 rescued mice, we quantified the response-threshold for all RGCs (N=1954) in MEA recordings  
452 from 11 mice (3 control *Cngb1ΔCaM* mice, 3 *Cngb1<sup>neo/neo</sup>* mice, 5 tamoxifen-treated *Cngb1*  
453 mice). RGC response thresholds were quantified as the lowest flash intensity needed to drive  
454 the average spike rate change two standard deviations above baseline (eg. Fig 7A<sub>3</sub>, 7B<sub>3</sub>, 7C<sub>3</sub>;  
455 see Methods). Average RGC response threshold distributions were similar between control and  
456 *Cngb1* rescued mice, but were significantly higher in untreated *Cngb1<sup>neo/neo</sup>* mice (Fig 7D; KS  
457 test, p<0.05). Additionally, the fraction of RGCs for which no-threshold response could be  
458 measured was similar between control and *Cngb1* rescued mice but significantly higher in  
459 untreated *Cngb1<sup>neo/neo</sup>* mice (Fig 7E; *t*-test, p<0.05). These results indicate a broad and lasting  
460 recovery of rod and circuit functions in *Cngb1* rescued mice.

461

## 462 Discussion

463

464 In contrast to other neurons, rods and cones are depolarized in darkness and tonically  
465 release glutamate through ribbon synapses (Molday and Moritz, 2015), leading to saturation of  
466 rod-to-rod bipolar cell synapses (Sampath and Rieke, 2004). Light exposure causes graded  
467 hyperpolarization of the photoreceptor cell and suppression of glutamate release. Reductions in  
468 glutamate release from photoreceptors that occur during the early process of retinal  
469 degeneration lead to homeostatic changes in the downstream neurons and degrade the retinal  
470 circuit. This is seen in the dissolution of synaptic structures, dendritic sprouting, formation of  
471 ectopic contacts, and gliosis (Marc et al., 2003; Puthussery and Taylor, 2010). Although  
472 strategies to rescue and restore function in defective photoreceptors have shown success for  
473 regaining some visual function, gene and stem cell therapies for visual restoration are often  
474 implemented in the adult; how well these rescued neurons reinstate their detailed circuitries in  
475 the remodeled retina is not known. Here we examined functional restoration at the level of inner

476 retinal cells and defined rod-driven circuits in the young adult mouse retina. We show that  
477 repairing a primary genetic defect in rods not only restored rod function, but also recovered  
478 normal synaptic connectivity with remodeled second order rod bipolar cells.

479

#### 480 **Rod-to-rod bipolar cell synaptic contacts are reduced in *Cngb1*<sup>neo/neo</sup> retina and do not** 481 **support synaptic transmission**

482 The relatively slow photoreceptor degeneration we observe in the *Cngb1*<sup>neo/neo</sup> mouse  
483 model, and observed in human patients (Bareil et al., 2001; Biel and Michalakis, 2007), may be  
484 due to the fact that it is not a functional null. A small but measurable light response persisted in  
485 *Cngb1*<sup>neo/neo</sup> rods from 1 MO mice (Fig. 4B). The residual light response is probably due to the  
486 presence of homomeric channels composed of CNGA1 subunits, which are capable of  
487 mediating a diminished and desensitized cGMP-dependent current (Kaupp et al., 1989). The  
488 small current would reduce Ca<sup>2+</sup> influx to the outer segment, causing increased levels of cGMP  
489 through stimulation of guanylyl cyclases by Ca<sup>2+</sup>-free guanylyl cyclase activating proteins 1 and  
490 2 (Mendez et al., 2001; Dizhoor et al., 2010). Elevated cGMP has been shown to be a driver of  
491 rod degeneration through activation of protein kinase G (Ma et al., 2015; Wang et al., 2017a).

492 Despite the diminished rod light responses in the *Cngb1*<sup>neo/neo</sup> mice, the utter lack of  
493 evidence for light-evoked transmission between rods and rod bipolar cells was unexpected,  
494 especially given our ultrastructural evidence showing that the number of triads in the  
495 *Cngb1*<sup>neo/neo</sup> rod spherules was reduced, but not fully eliminated (Fig. 1). Therefore, it is  
496 surprising that ERGs from *Cngb1*<sup>neo/neo</sup> mice did not exhibit a scotopic b-wave, which is largely  
497 contributed by rod bipolar cells (Fig. 2B; (Saszik et al., 2002). This result was further  
498 corroborated by patch-clamp measurements from rod bipolar cells that revealed no light  
499 response, even for bright flashes delivering ~2000 Rh\*/rod (Fig. 6C). We speculate that this  
500 defect in synaptic transmission is due to diminished glutamate release at the ribbon synapse  
501 given that the lack of CNG channels should act as a source of “equivalent light”, similar to light-  
502 induced closure of CNG channels (see also Sampath and Rieke, 2004; Dunn et al., 2006).  
503 Supporting this idea, the resting membrane potential of *Cngb1*<sup>neo/neo</sup> rods are ~10 mV  
504 hyperpolarized due to their smaller dark current (Fig. 4A). At the rod’s normal resting potential in  
505 darkness (~40 mV), calcium enters through the voltage gated channel (Ca<sub>v</sub>1.4) and supports  
506 tonic glutamate release at the ribbon synapse (Waldner et al., 2018). Thus the hyperpolarizing  
507 shift in resting potential of *Cngb1*<sup>neo/neo</sup> rods predicts attenuated glutamate release from the rod  
508 spherule.

509            Interestingly, suppression of glutamate release at the rod synapse is strongly correlated  
510 with synaptic remodeling. Examples include blockade of glutamate release by tetanus toxin  
511 (Cao et al., 2015), in knockout mice that lack the presynaptic  $\text{Ca}_v1.4$   $\text{Ca}^{2+}$  channel (Mansergh et  
512 al., 2005), and in human patients diagnosed with congenital stationary night blindness (CSNB2)  
513 that harbor null mutations in the gene encoding  $\text{Ca}_v1.4$  (Bech-Hansen et al., 1998; Boycott et  
514 al., 2000). Calcium entry through  $\text{Ca}_v1.4$  channel is required for neurotransmitter release at the  
515 ribbon synapse of both rods and cones. The absence of CaBP4 (Haeseleer et al., 2004) or  $\alpha 2\delta 4$   
516 (Wang et al., 2017c) that bind and regulate the activity of  $\text{Ca}_v1.4$ , also manifest in retinal  
517 remodeling in knockout mice. These plastic changes occurred with minimal photoreceptor cell  
518 loss, suggesting that synaptic remodeling is likely driven by suppression of neural transmission,  
519 or deafferentation, rather than photoreceptor cell death *per se*. Modest synaptic changes were  
520 also observed in RIBEYE knockout retinas. RIBEYE is an essential component of the synaptic  
521 ribbon, and its absence abolished all presynaptic ribbons in the retina and severely impaired  
522 fast and sustained neurotransmitter release (Maxeiner et al., 2016). Spontaneous miniature  
523 release continues to occur without the synaptic ribbon, which may explain the milder retinal  
524 remodeling phenotype observed in the RIBEYE knockout retina (Maxeiner et al., 2016).

525            Previous studies on two independent lines of *Cngb1*<sup>-/-</sup> mice have similarly reported a  
526 substantial reduction of light responses from *Cngb1*<sup>-/-</sup> rods, but in both mouse lines the presence  
527 of a rod bipolar cell driven b-wave was observed (Hüttl et al., 2005; Zhang et al., 2009). The  
528 reason behind the discrepancy between those and our results is not clear, but may be due to  
529 differences in: 1) the degree of rod hyperpolarization caused by the number of functioning  
530 homomeric CNGA1 channels and hence the amount of glutamate released by rods in the  
531 different mouse lines, 2) the *in vivo* vs. *ex vivo* ERG measurements, or 3) mouse genetic  
532 backgrounds.

533

### 534 **Adult rod bipolar cells demonstrate plastic changes to establish functional contacts with** 535 **rescued rods**

536            The developmental time window for the formation of the rod to rod bipolar cell synapse  
537 in mice appears to be from eye opening to postnatal day 30 (P30), during which synaptic  
538 proteins are expressed, pre- and post-synaptic molecular complexes form, and the rod bipolar  
539 cells develop the appropriate number of dendritic tips that make synaptic contacts with rods  
540 (Anastassov et al., 2017). Some of the molecules that guide neurite growth during development  
541 are absent at maturity (D'Orazi et al., 2014), and if functional connectivity of the neural retina  
542 can only occur during a critical period in development, then one would expect that the adult



543 retina may lack the ability to make such connections when rod activity is switched on after this  
544 time window. Such developmental processes would have been disrupted in *Cngb1<sup>neo/neo</sup>* retinas,  
545 wherein pronounced retinal remodeling is evident by P30 (Fig. 1). We show that tamoxifen-  
546 induced CNGB1 expression between P28-P34 led to establishment of the rod's circulating  
547 current in darkness and normal light responses (Fig. 4). Concomittantly, structural changes  
548 were observed at the synapse: rod bipolar cells elaborated fine dendritic tips, mGluR6 receptors  
549 clustered on these tips which came in close contact with presynaptic ribbons (Fig. 5G-5I). These  
550 newly formed synaptic structures supported normal neural transmission, as shown by ERG  
551 recordings and patch recordings from rod bipolar cells (Fig. 6), and light sensitivity in increased  
552 in RGCs (Fig. 7). We hypothesize that these changes may be initiated by glutamate release at  
553 the rod's synapse, similar to that which occurs at the cortex, where focal uncaging of glutamate  
554 in mouse cortical layer 2/3 pyramidal neurons triggered spinogenesis from the dendrite shaft in  
555 a location-specific manner (Kwon and Sabatini, 2011).

556         Plasticity at the photoreceptor/bipolar cell synapse has also been observed in a model of  
557 photocoagulation of rabbit retina, where the laser ablation acutely removes a patch of  
558 photoreceptors while leaving the inner retina intact (Beier et al., 2017). After some days, nearby  
559 photoreceptors slowly migrate toward and fill in the lesioned area (Sher et al., 2013). As they do  
560 so, they form functional contacts with the deafferented bipolar cells (Sher et al., 2013; Beier et  
561 al., 2017). Another example of plasticity at the photoreceptor/bipolar cell synapse is the AAV-  
562 mediated gene therapy to replace retinoschisin (RS1) in adult mice (Ou et al., 2015). Retinal  
563 development of the RS1 knockout mice appears to proceed normally. However, the absence of  
564 RS1, a cell adhesion protein, eventually causes splitting of the retina and a failure of synaptic  
565 maintenance that manifests in reduction of the ERG b-wave amplitude (Sikkink et al., 2007).  
566 This defect was reversed upon RS1 gene replacement (Ou et al., 2015). Here we demonstrate  
567 for the first time that activation of rod input in young adults reversed synaptic changes that  
568 occurred during development and established functional contacts with their downstream  
569 neurons in the retinal circuitry of the adult retina. These results support the therapeutic potential  
570 of repairing or replacing defective rods in the degenerating retina. However, a critical time  
571 window for rescue likely exists: recent clinical trials for Leber Congenital Amaurosis to replace  
572 RPE65 in human patients for treating a type of Leber's congenital amaurosis (LCA) caused by  
573 RPE65 mutations show limited success in visual improvement, and the retina continued to  
574 degenerate in some patients (Cideciyan et al., 2013). Future experimentation will address  
575 whether a critical time window of rescue exists for these approaches.

## 576 **References**

- 577
- 578 Anastassov IA, Wang W, Dunn FA (2017) Synaptogenesis and synaptic protein localization in  
579 the postnatal development of rod bipolar cell dendrites in mouse retina. *J Comp Neurol*.
- 580 Bareil C, Hamel CP, Delague V, Arnaud B, Demaille J, Claustres M (2001) Segregation of a  
581 mutation in CNGB1 encoding the beta-subunit of the rod cGMP-gated channel in a  
582 family with autosomal recessive retinitis pigmentosa. *Hum Genet* 108:328-334.
- 583 Bech-Hansen NT, Naylor MJ, Maybaum TA, Pearce WG, Koop B, Fishman GA, Mets M,  
584 Musarella MA, Boycott KM (1998) Loss-of-function mutations in a calcium-channel  
585 alpha1-subunit gene in Xp11.23 cause incomplete X-linked congenital stationary night  
586 blindness. *Nat Genet* 19:264-267.
- 587 Beier C, Hovhannisyan A, Weiser S, Kung J, Lee S, Lee DY, Huie P, Dalal R, Palanker D, Sher  
588 A (2017) Deafferented Adult Rod Bipolar Cells Create New Synapses with  
589 Photoreceptors to Restore Vision. *J Neurosci* 37:4635-4644.
- 590 Bermingham-McDonogh O, Reh TA (2011) Regulated reprogramming in the regeneration of  
591 sensory receptor cells. *Neuron* 71:389-405.
- 592 Biel M, Michalakis S (2007) Function and dysfunction of CNG channels: insights from  
593 channelopathies and mouse models. *Molecular neurobiology* 35:266-277.
- 594 Boycott KM, Pearce WG, Bech-Hansen NT (2000) Clinical variability among patients with  
595 incomplete X-linked congenital stationary night blindness and a founder mutation in  
596 CACNA1F. *Can J Ophthalmol* 35:204-213.
- 597 Cao Y, Sarria I, Fehlh Haber KE, Kamasawa N, Orlandi C, James KN, Hazen JL, Gardner MR,  
598 Farzan M, Lee A, Baker S, Baldwin K, Sampath AP, Martemyanov KA (2015)  
599 Mechanism for Selective Synaptic Wiring of Rod Photoreceptors into the Retinal  
600 Circuitry and Its Role in Vision. *Neuron* 87:1248-1260.
- 601 Chang B, Hawes NL, Pardue MT, German AM, Hurd RE, Davisson MT, Nusinowitz S,  
602 Rengarajan K, Boyd AP, Sidney SS, Phillips MJ, Stewart RE, Chaudhury R, Nickerson  
603 JM, Heckenlively JR, Boatright JH (2007) Two mouse retinal degenerations caused by  
604 missense mutations in the beta-subunit of rod cGMP phosphodiesterase gene. *Vision*  
605 *Res* 47:624-633.
- 606 Chen J, Woodruff ML, Wang T, Concepcion FA, Tranchina D, Fain GL (2010) Channel  
607 modulation and the mechanism of light adaptation in mouse rods. *The Journal of*  
608 *neuroscience : the official journal of the Society for Neuroscience* 30:16232-16240.
- 609 Chichilnisky EJ, Rieke F (2005) Detection sensitivity and temporal resolution of visual signals  
610 near absolute threshold in the salamander retina. *The Journal of neuroscience : the*  
611 *official journal of the Society for Neuroscience* 25:318-330.
- 612 Chua J, Fletcher EL, Kalloniatis M (2009) Functional remodeling of glutamate receptors by inner  
613 retinal neurons occurs from an early stage of retinal degeneration. *J Comp Neurol*  
614 514:473-491.
- 615 Cideciyan AV, Jacobson SG, Beltran WA, Sumaroka A, Swider M, Iwabe S, Roman AJ,  
616 Olivares MB, Schwartz SB, Komaromy AM, Hauswirth WW, Aguirre GD (2013) Human  
617 retinal gene therapy for Leber congenital amaurosis shows advancing retinal  
618 degeneration despite enduring visual improvement. *Proceedings of the National*  
619 *Academy of Sciences of the United States of America* 110:E517-525.
- 620 Concepcion F, Chen J (2010) Q344ter mutation causes mislocalization of rhodopsin molecules  
621 that are catalytically active: a mouse model of Q344ter-induced retinal degeneration.  
622 *PLoS One* 5:e10904.
- 623 Cook NJ, Molday LL, Reid D, Kaupp UB, Molday RS (1989) The cGMP-gated channel of bovine  
624 rod photoreceptors is localized exclusively in the plasma membrane. *J Biol Chem*  
625 264:6996-6999.

- 626 D'Orazi FD, Suzuki SC, Wong RO (2014) Neuronal remodeling in retinal circuit assembly,  
627 disassembly, and reassembly. *Trends Neurosci* 37:594-603.
- 628 Dacheux RF, Raviola E (1986) The rod pathway in the rabbit retina: a depolarizing bipolar and  
629 amacrine cell. *The Journal of neuroscience : the official journal of the Society for*  
630 *Neuroscience* 6:331-345.
- 631 Dizhoor AM, Olshevskaya EV, Peshenko IV (2010) Mg<sup>2+</sup>/Ca<sup>2+</sup> cation binding cycle of guanylyl  
632 cyclase activating proteins (GCAPs): role in regulation of photoreceptor guanylyl  
633 cyclase. *Mol Cell Biochem* 334:117-124.
- 634 Farber DB, Lolley RN (1974) Cyclic guanosine monophosphate: elevation in degenerating  
635 photoreceptor cells of the C3H mouse retina. *Science* 186:449-451.
- 636 Field GD, Rieke F (2002) Nonlinear signal transfer from mouse rods to bipolar cells and  
637 implications for visual sensitivity. *Neuron* 34:773-785.
- 638 Field GD, Sampath AP (2017) Behavioural and physiological limits to vision in mammals. *Philos*  
639 *Trans R Soc Lond B Biol Sci* 372.
- 640 Field GD, Gauthier JL, Sher A, Greschner M, Machado TA, Jepson LH, Shlens J, Gunning DE,  
641 Mathieson K, Dabrowski W, Paninski L, Litke AM, Chichilnisky EJ (2010) Functional  
642 connectivity in the retina at the resolution of photoreceptors. *Nature* 467:673-677.
- 643 Garg A, Yang J, Lee W, Tsang SH (2017) Stem Cell Therapies in Retinal Disorders. *Cells* 6.
- 644 Granit R (1933) The components of the retinal action potential in mammals and their relation to  
645 the discharge in the optic nerve. *J Physiol* 77:207-239.
- 646 Grunwald ME, Yu WP, Yu HH, Yau KW (1998) Identification of a domain on the beta-subunit of  
647 the rod cGMP-gated cation channel that mediates inhibition by calcium-calmodulin. *J*  
648 *Biol Chem* 273:9148-9157.
- 649 Haeseleer F, Imanishi Y, Maeda T, Possin DE, Maeda A, Lee A, Rieke F, Palczewski K (2004)  
650 Essential role of Ca<sup>2+</sup>-binding protein 4, a Cav1.4 channel regulator, in photoreceptor  
651 synaptic function. *Nat Neurosci* 7:1079-1087.
- 652 Hayashi S, McMahon AP (2002) Efficient recombination in diverse tissues by a tamoxifen-  
653 inducible form of Cre: a tool for temporally regulated gene activation/inactivation in the  
654 mouse. *Dev Biol* 244:305-318.
- 655 Hoyo NL, Lopez-Begines S, Rosa JL, Chen J, Mendez A (2014) Functional EF-hands in  
656 neuronal calcium sensor GCAP2 determine its phosphorylation state and subcellular  
657 distribution in vivo, and are essential for photoreceptor cell integrity. *PLoS Genet*  
658 10:e1004480.
- 659 Hüttl S, Michalakis S, Seeliger M, Luo DG, Acar N, Geiger H, Hudl K, Mader R, Haverkamp S,  
660 Moser M, Pfeifer A, Gerstner A, Yau KW, Biel M (2005) Impaired channel targeting and  
661 retinal degeneration in mice lacking the cyclic nucleotide-gated channel subunit CNGB1.  
662 *J Neurosci* 25:130-138.
- 663 Kaupp UB, Niidome T, Tanabe T, Terada S, Bonigk W, Stuhmer W, Cook NJ, Kangawa K,  
664 Matsuo H, Hirose T, et al. (1989) Primary structure and functional expression from  
665 complementary DNA of the rod photoreceptor cyclic GMP-gated channel. *Nature*  
666 342:762-766.
- 667 Koch S, Sothilingam V, Garcia Garrido M, Tanimoto N, Becirovic E, Koch F, Seide C, Beck SC,  
668 Seeliger MW, Biel M, Muhlfriedel R, Michalakis S (2012) Gene therapy restores vision  
669 and delays degeneration in the CNGB1(-/-) mouse model of retinitis pigmentosa. *Hum*  
670 *Mol Genet* 21:4486-4496.
- 671 Kwon HB, Sabatini BL (2011) Glutamate induces de novo growth of functional spines in  
672 developing cortex. *Nature* 474:100-104.
- 673 Ma H, Butler MR, Thapa A, Belcher J, Yang F, Baehr W, Biel M, Michalakis S, Ding XQ (2015)  
674 cGMP/Protein Kinase G Signaling Suppresses Inositol 1,4,5-Trisphosphate Receptor  
675 Phosphorylation and Promotes Endoplasmic Reticulum Stress in Photoreceptors of  
676 Cyclic Nucleotide-gated Channel-deficient Mice. *J Biol Chem* 290:20880-20892.

- 677 Mansergh F, Orton NC, Vessey JP, Lalonde MR, Stell WK, Tremblay F, Barnes S, Rancourt  
678 DE, Bech-Hansen NT (2005) Mutation of the calcium channel gene *Cacna1f* disrupts  
679 calcium signaling, synaptic transmission and cellular organization in mouse retina. *Hum*  
680 *Mol Genet* 14:3035-3046.
- 681 Marc RE, Jones BW (2003) Retinal remodeling in inherited photoreceptor degenerations. *Mol*  
682 *Neurobiol* 28:139-147.
- 683 Marc RE, Jones BW, Watt CB, Strettoi E (2003) Neural remodeling in retinal degeneration. *Prog*  
684 *Retin Eye Res* 22:607-655.
- 685 Maxeiner S, Luo F, Tan A, Schmitz F, Sudhof TC (2016) How to make a synaptic ribbon:  
686 RIBEYE deletion abolishes ribbons in retinal synapses and disrupts neurotransmitter  
687 release. *Embo J* 35:1098-1114.
- 688 Mendez A, Burns ME, Sokal I, Dizhoor AM, Baehr W, Palczewski K, Baylor DA, Chen J (2001)  
689 Role of guanylate cyclase-activating proteins (GCAPs) in setting the flash sensitivity of  
690 rod photoreceptors. *Proc Natl Acad Sci U S A* 98:9948-9953.
- 691 Molday RS, Moritz OL (2015) Photoreceptors at a glance. *J Cell Sci* 128:4039-4045.
- 692 Ou J, Vijayasathy C, Ziccardi L, Chen S, Zeng Y, Marangoni D, Pope JG, Bush RA, Wu Z, Li  
693 W, Sieving PA (2015) Synaptic pathology and therapeutic repair in adult retinoschisis  
694 mouse by AAV-RS1 transfer. *J Clin Invest* 125:2891-2903.
- 695 Pahlberg J, Frederiksen R, Pollock GE, Miyagishima KJ, Sampath AP, Cornwall MC (2017)  
696 Voltage-sensitive conductances increase the sensitivity of rod photoresponses following  
697 pigment bleaching. *J Physiol* 595:3459-3469.
- 698 Poetsch A, Molday LL, Molday RS (2001) The cGMP-gated channel and related glutamic acid-  
699 rich proteins interact with peripherin-2 at the rim region of rod photoreceptor disc  
700 membranes. *J Biol Chem* 276:48009-48016.
- 701 Puthussery T, Taylor WR (2010) Functional changes in inner retinal neurons in animal models  
702 of photoreceptor degeneration. *Adv Exp Med Biol* 664:525-532.
- 703 Quartilho A, Simkiss P, Zekite A, Xing W, Wormald R, Bunce C (2016) Leading causes of  
704 certifiable visual loss in England and Wales during the year ending 31 March 2013. *Eye*  
705 (Lond) 30:602-607.
- 706 Sampath AP, Rieke F (2004) Selective transmission of single photon responses by saturation at  
707 the rod-to-rod bipolar synapse. *Neuron* 41:431-443.
- 708 Saszik SM, Robson JG, Frishman LJ (2002) The scotopic threshold response of the dark-  
709 adapted electroretinogram of the mouse. *J Physiol* 543:899-916.
- 710 Scholl HP, Strauss RW, Singh MS, Dalkara D, Roska B, Picaud S, Sahel JA (2016) Emerging  
711 therapies for inherited retinal degeneration. *Sci Transl Med* 8:368rv366.
- 712 Sher A, Jones BW, Huie P, Paulus YM, Lavinsky D, Leung LS, Nomoto H, Beier C, Marc RE,  
713 Palanker D (2013) Restoration of retinal structure and function after selective  
714 photocoagulation. *J Neurosci* 33:6800-6808.
- 715 Sikkink SK, Biswas S, Parry NR, Stanga PE, Trump D (2007) X-linked retinoschisis: an update.  
716 *J Med Genet* 44:225-232.
- 717 Soto F, Kerschensteiner D (2015) Synaptic remodeling of neuronal circuits in early retinal  
718 degeneration. *Front Cell Neurosci* 9:395.
- 719 Vinberg F, Wang T, Molday RS, Chen J, Kefalov VJ (2015) A new mouse model for stationary  
720 night blindness with mutant *Slc24a1* explains the pathophysiology of the associated  
721 human disease. *Human molecular genetics* 24:5915-5929.
- 722 Waldner DM, Bech-Hansen NT, Stell WK (2018) Channeling Vision: CaV1.4-A Critical Link in  
723 Retinal Signal Transmission. *Biomed Res Int* 2018:7272630.
- 724 Wang T, Chen J (2014) Induction of the unfolded protein response by constitutive G-protein  
725 signaling in rod photoreceptor cells. *J Biol Chem* 289:29310-29321.
- 726 Wang T, Tsang SH, Chen J (2017a) Two pathways of rod photoreceptor cell death induced by  
727 elevated cGMP. *Hum Mol Genet* 26:2299-2306.

- 728 Wang X, Zhao L, Zhang Y, Ma W, Gonzalez SR, Fan J, Kretschmer F, Badea TC, Qian HH,  
729 Wong WT (2017b) Tamoxifen Provides Structural and Functional Rescue in Murine  
730 Models of Photoreceptor Degeneration. *J Neurosci* 37:3294-3310.
- 731 Wang Y, Fehlhauer KE, Sarria I, Cao Y, Ingram NT, Guerrero-Given D, Throesch B, Baldwin K,  
732 Kamasawa N, Ohtsuka T, Sampath AP, Martemyanov KA (2017c) The Auxiliary Calcium  
733 Channel Subunit  $\alpha 2\delta 4$  Is Required for Axonal Elaboration, Synaptic  
734 Transmission, and Wiring of Rod Photoreceptors. *Neuron* 93:1359-1374 e1356.
- 735 Yao K, Qiu S, Wang YV, Park SJH, Mohns EJ, Mehta B, Liu X, Chang B, Zenisek D, Crair MC,  
736 Demb JB, Chen B (2018) Restoration of vision after de novo genesis of rod  
737 photoreceptors in mammalian retinas. *Nature* 560:484-488.
- 738 Yu WQ, Grzywacz NM, Lee EJ, Field GD (2017) Cell type-specific changes in retinal ganglion  
739 cell function induced by rod death and cone reorganization in rats. *J Neurophysiol*  
740 118:434-454.
- 741 Zhang Y, Molday LL, Molday RS, Sarfare SS, Woodruff ML, Fain GL, Kraft TW, Pittler SJ (2009)  
742 Knockout of GARPs and the beta-subunit of the rod cGMP-gated channel disrupts disk  
743 morphogenesis and rod outer segment structural integrity. *J Cell Sci* 122:1192-1200.  
744

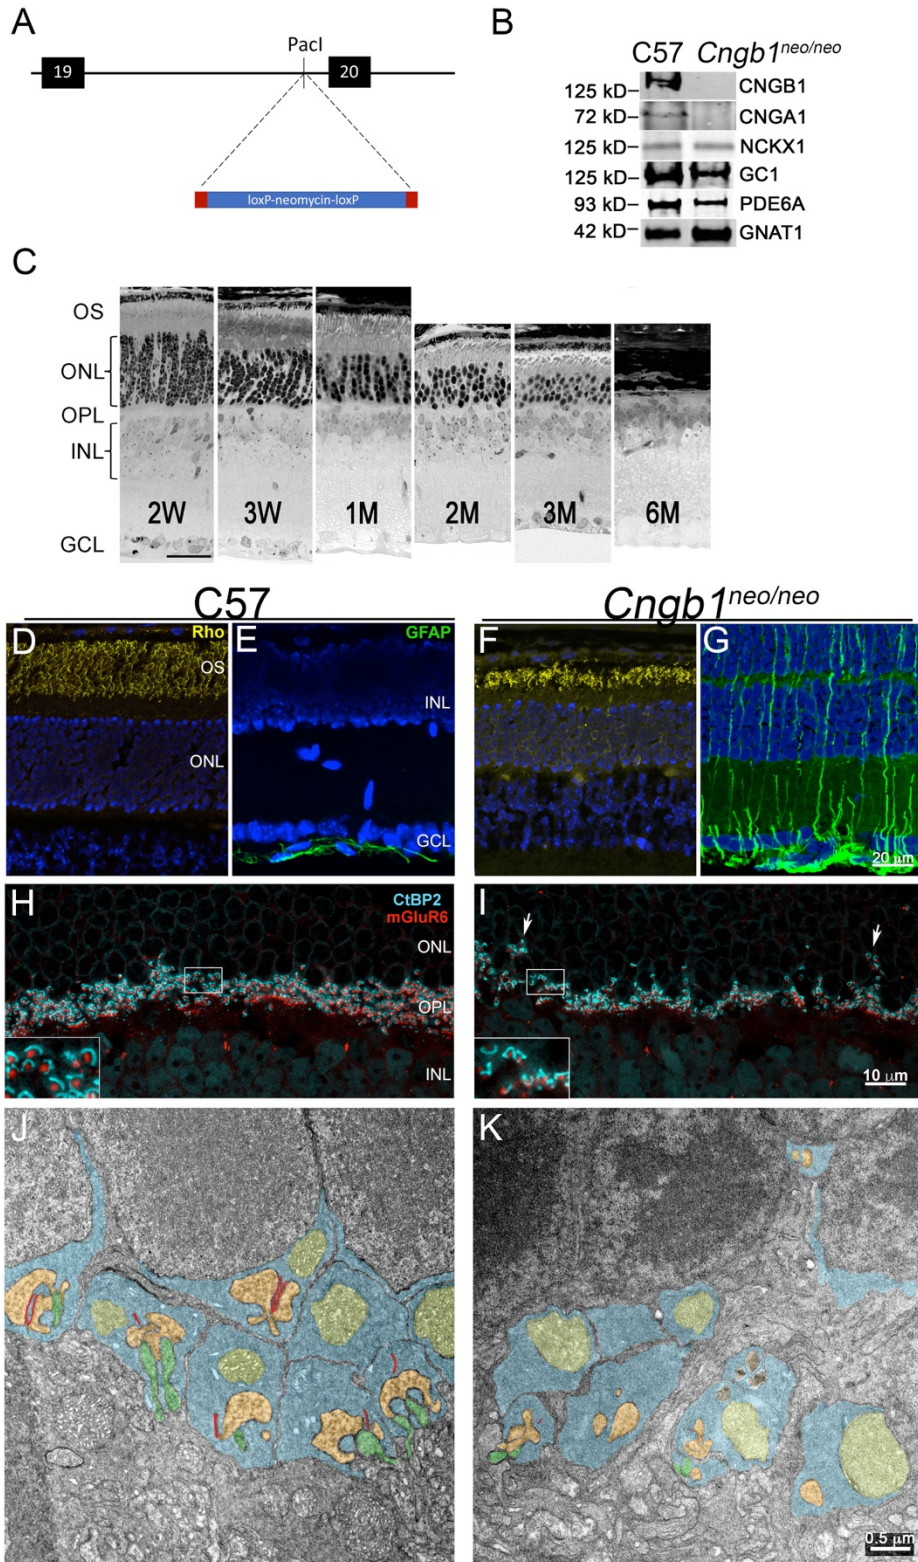

746 **Figure 1.** Retinas from *Cngb1<sup>neo/neo</sup>* mice exhibit stereotypic degenerative changes. (A) The 1.8  
747 kb neomycin cassette, flanked by loxP sites, was inserted into intron 19 of the *Cngb1* gene. (B).  
748 Western blots of retinal homogenates from control and *Cngb1<sup>neo/neo</sup>* mice show that the  
749 neomycin insertion blocked expression of CNGB1, and down regulated expression of CNGA1  
750 channel proteins. C. Light micrograph of representative retinal sections prepared from  
751 *Cngb1<sup>neo/neo</sup>* mice at the indicated ages. Scale bar = 20  $\mu$ m. (D-I) Cryosections from 1 MO C57  
752 (left panels) and 1 MO *Cngb1<sup>neo/neo</sup>* mice (right panels). Rhodopsin is localized to the outer  
753 segment (D) and GFAP to the inner limiting membrane proximal to the ganglion cell layer (E) in  
754 C57 retina. In contrast, the outer segment of mutant retina is shortened, and rhodopsin is  
755 mislocalized to the outer nuclear layer (F), and GFAP immunoreactivity extends to the entire  
756 retina (G). Nuclei are stained with DAPI (blue). (H) C57 and (I) *Cngb1<sup>neo/neo</sup>* retinal sections  
757 stained for synaptic ribbons (CtBP2, blue) of photoreceptors and mGluR6 puncta (red) of  
758 bipolar cell dendrites. Transmission electron microscopy of C57 (J) and *Cngb1<sup>neo/neo</sup>* (K) retinal  
759 sections. Color coding is as follows: rod spherule (blue), mitochondria (yellow), synaptic ribbon  
760 (red), horizontal cell (orange) and rod bipolar cell (green). OS, outer segment; ONL, outer  
761 nuclear layer; OPL, outer plexiform layer; INL, inner nuclear layer; GCL, ganglion cell layer.

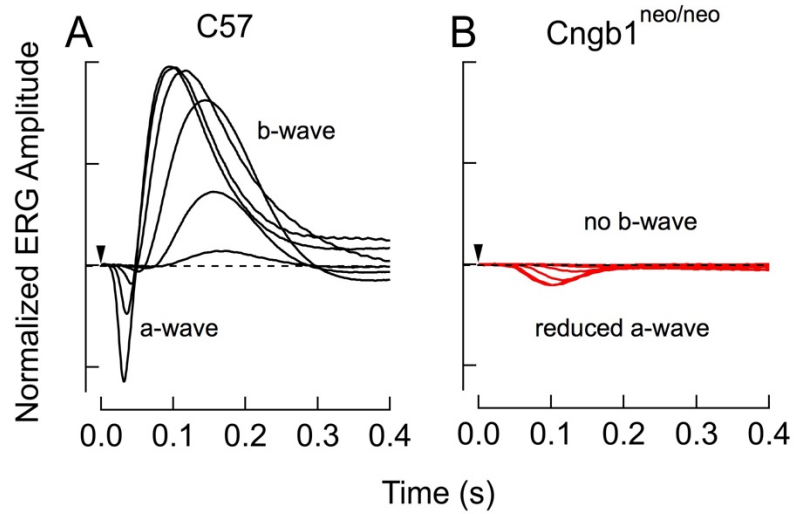

762

763

764 **Figure 2.** Characterization of rod function by *ex-vivo* electroretinography (ERGs). (A) ERG  
765 recordings from a 3 MO C57 mouse show normal a- and b-waves (rod and RBC responses,  
766 respectively). Flashes generated 2, 9, 35, 140, 560, and 2200 Rh\*/rod (B) ERGs from 1 MO  
767 Cngb1<sup>neo/neo</sup> mice show total absence of the b-wave, consistent with disrupted rod-to-RBC  
768 signaling. Flashes generated 550, 2200, 8800, 18,000, and 35,000 Rh\*/rod.



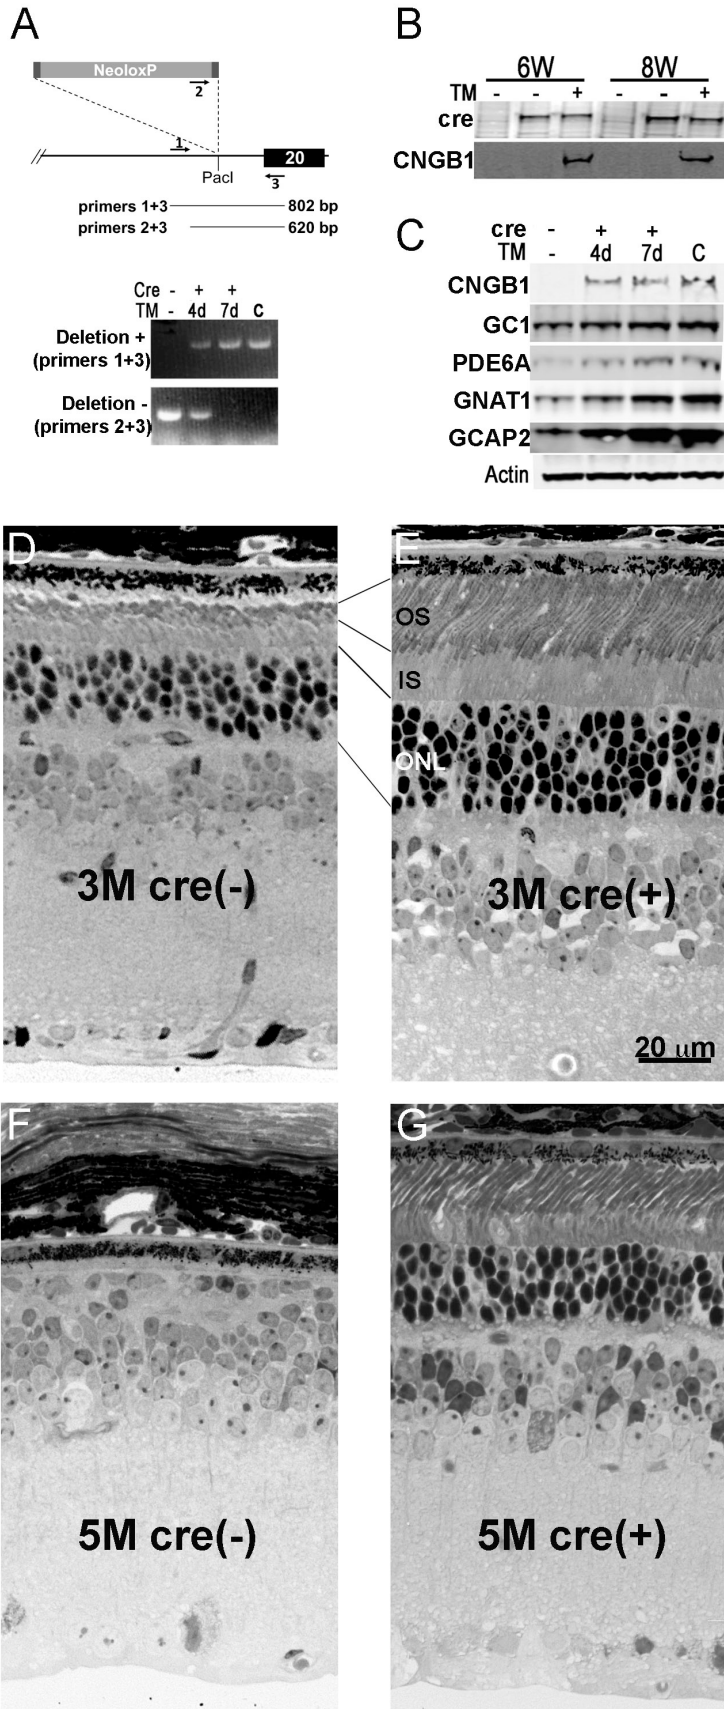

770 **Figure 3.** Excision of the floxed neomycin cassette restores CNG channel expression and  
771 rescues rod cell death. (A) PCR primers 1, 2, and 3 were designed to detect the presence or  
772 absence of the neoloxP cassette. Littermate mice were treated with tamoxifen (TM) for the  
773 indicated number of days starting at 4 weeks and retinal DNA was extracted from mice at 8  
774 weeks. Control retinal DNA “c” is from a germline-floxed mouse wherein the neoloxP cassette  
775 has been removed in all tissues (*Cngb1 $\Delta$ CaM*). (B) Western blots of retinal homogenates from  
776 cre-negative and cre-positive littermate mice of the indicated ages (6 weeks, 8 weeks) that were  
777 treated with TM or vehicle (corn oil) beginning at 4 weeks old for four consecutive days. (C)  
778 Western blot of retinal homogenate prepared from the contralateral eye from mice used in (A).  
779 Representative retinal morphology (N = 3) of 3 MO cre-negative (D) or cre-positive littermates  
780 (E) mice treated with tamoxifen for 7 consecutive days beginning at 4 weeks. TM-treatment of  
781 cre-positive mice showed improved outer segment (OS) length and thicker outer nuclear layer  
782 (ONL), indicating a halt on cell death. (F) cre-negative and (G) cre-positive littermates treated  
783 with tamoxifen for 4 consecutive days starting at P28, and retinal morphology was examined at  
784 5 months of age (representative image from N  $\geq$  3). Scale bar = 20  $\mu$ m.

785

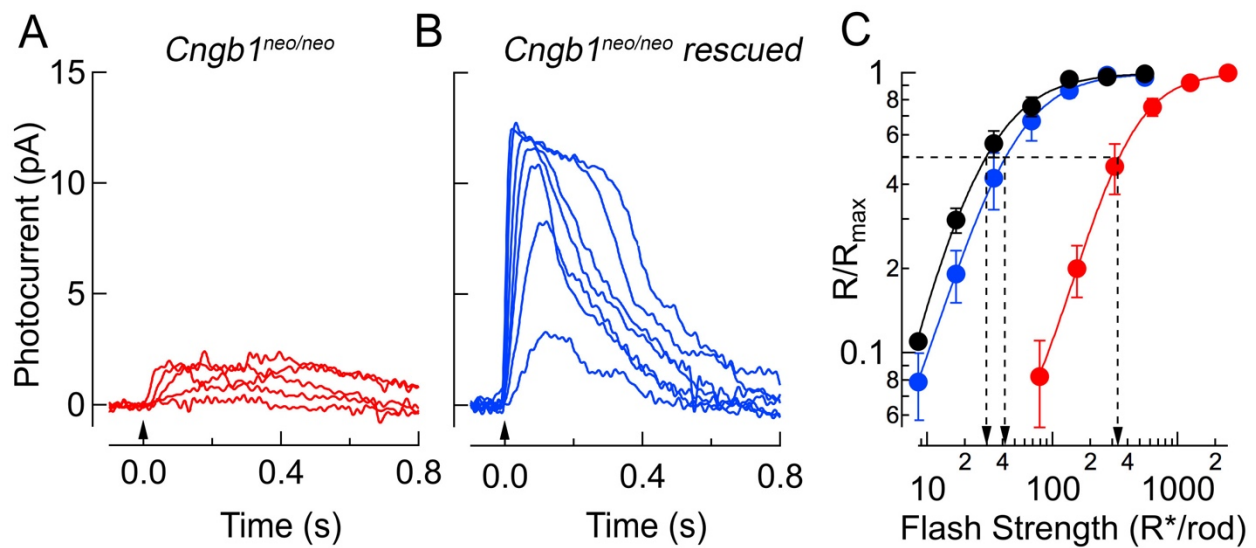

786

787

788 **Figure 4.** Light sensitivity is improved following expression of CNGB1. (A) Single cell recordings  
789 show small, desensitized response families in *Cngb1<sup>neo/neo</sup>* mice likely reflecting residual CNG  
790 channels composed of CNGA1 monomers. Flashes generated 79, 160, 310, 270, 1300, and  
791 2500  $Rh^*/\text{rod}$ . (B) Following tamoxifen treatment, rod responses showed amplitudes and  
792 sensitivity resembling those of C57; flash strengths were 9, 17, 34, 68, 140, 270, and 540  
793  $Rh^*/\text{rod}$ . (C) Response-intensity relationships from single-cell recordings display ~10-fold  
794 reduction in sensitivity between WT (black dots) and *Cngb1<sup>neo/neo</sup>* (red dots) ( $I_{1/2}$  values were  $27 \pm$   
795  $4$  ( $n=5$ ) and  $360 \pm 8$  ( $n=9$ ), respectively). This sensitivity shift is nearly restored following  
796 reintroduction of the CNGB1 (blue dots;  $I_{1/2} = 43 \pm 3$  ( $n=10$ )).

797

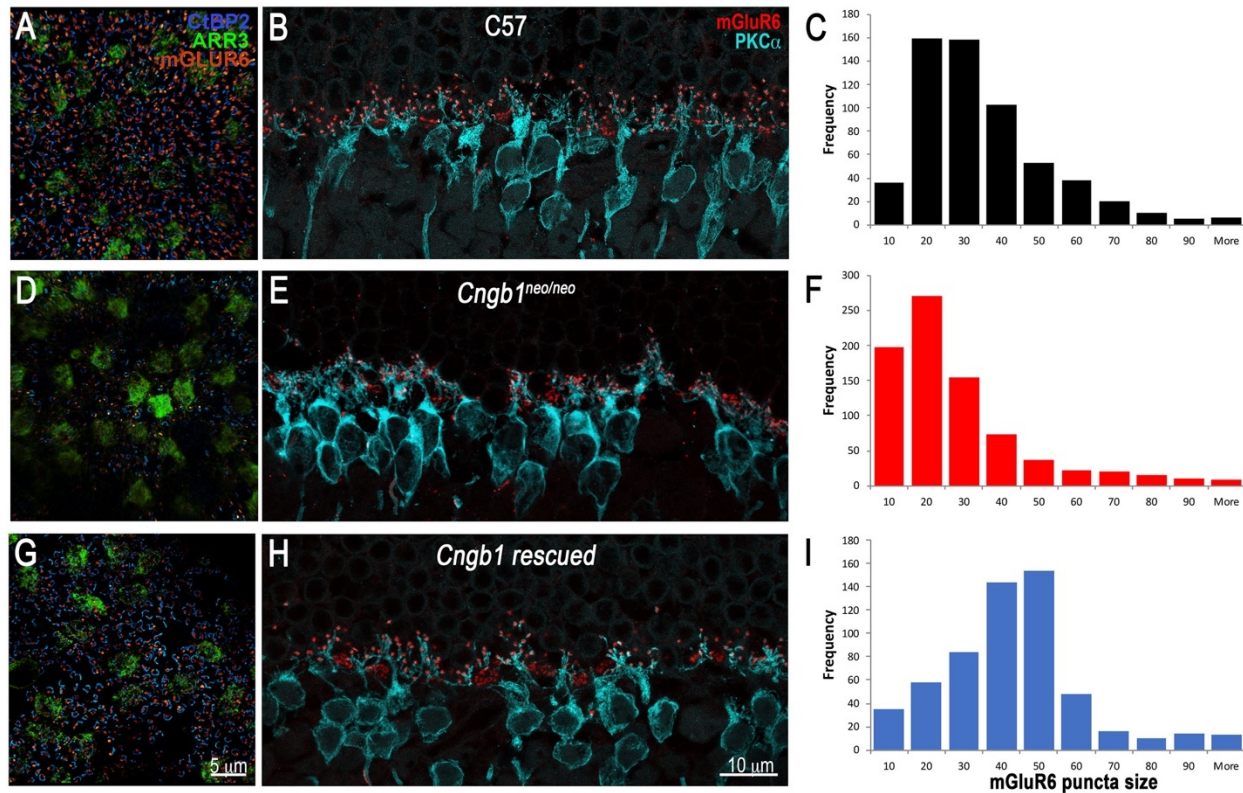

798

799

800 **Figure 5.** Expression of CNGB1 reverses pre- and postsynaptic retinal remodeling in  
801 *Cngb1<sup>neo/neo</sup>* retina. Shown are representative images from N>3 independent experiments. A, D  
802 and G are retinal flat mounts from 1 MO C57, 1 MO *Cngb1<sup>neo/neo</sup>* and 3 MO rescued *Cngb1* mice  
803 treated with tamoxifen for 7 consecutive days beginning at 4 weeks of age, respectively. The flat  
804 mounts were stained with the pre-synaptic ribbon marker, CtBP2 (blue), and post-synaptic  
805 marker mGluR6 (orange). Cone pedicles were visualized using cone arrestin, ARR3 (green). B,  
806 E and H are retinal cross sections from mice of the same genotype as the flat mounts. The  
807 retinal sections were stained with antibodies to mGluR6 (red) and the rod bipolar cell marker,  
808 PKCα (teal). C, F and I are frequency vs. mGluR6 puncta size distributions for 1 MO C57, 1 MO  
809 *Cngb1<sup>neo/neo</sup>* and 3 MO rescued *Cngb1* mice treated with tamoxifen.

810

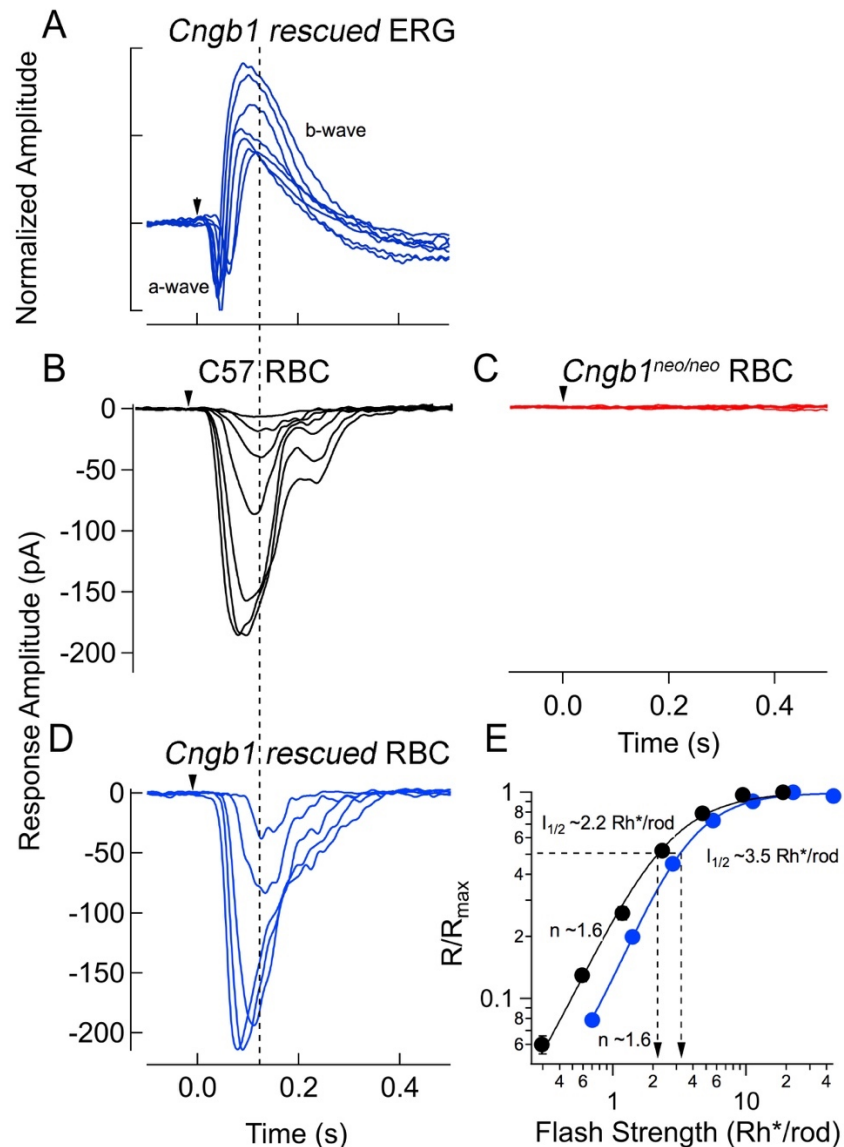

811  
812

813 **Figure 6.** Physiological responses from rod bipolar cells in retinal slices. A. *Ex-vivo* ERG  
814 responses from 3 to 6 MO mice after tamoxifen treatments show near normal a- and b-waves.  
815 Flashes generated 2, 9, 35, 140, 550, and 2200 Rh<sup>\*</sup>/rod. Please compare against Fig. 2A.  
816 Voltage-clamp rod bipolar cell recordings ( $V_m = -60$  mV) from the following mice: B. C57 rod  
817 bipolar cells (2-3 MO); C. *Cngb1*<sup>neo/neo</sup> rod bipolar cells (1 MO); D. *Cngb1* tamoxifen-treated (3  
818 MO). Flashes generated 2, 4, 8, 16, 31, 62 and 130 Rh<sup>\*</sup>/rod for C57 rod bipolar cells, and 280,  
819 560, 1100 and 2200 Rh<sup>\*</sup>/rod for *Cngb1*<sup>neo/neo</sup> rod bipolar cells. Light-evoked responses were  
820 never observed in *Cngb1*<sup>neo/neo</sup> rod bipolar cells (15 cells across 5 retinas – flashes generated  
821 2200 Rh<sup>\*</sup>/rod). E. Response-intensity relationships from mean data show that this relationship is  
822 shifted to higher flash strengths in rescued mice, reflecting some rod loss. The Hill exponent of  
823 rod bipolar cells were similar to normal following rod recovery (Hill exponent =  $1.6 \pm 0.05$   
824 ( $n=12$ )), in support of a restoration of the normal rod-to-rod bipolar cell synaptic structure and  
825 the dark rate of glutamate release.

826

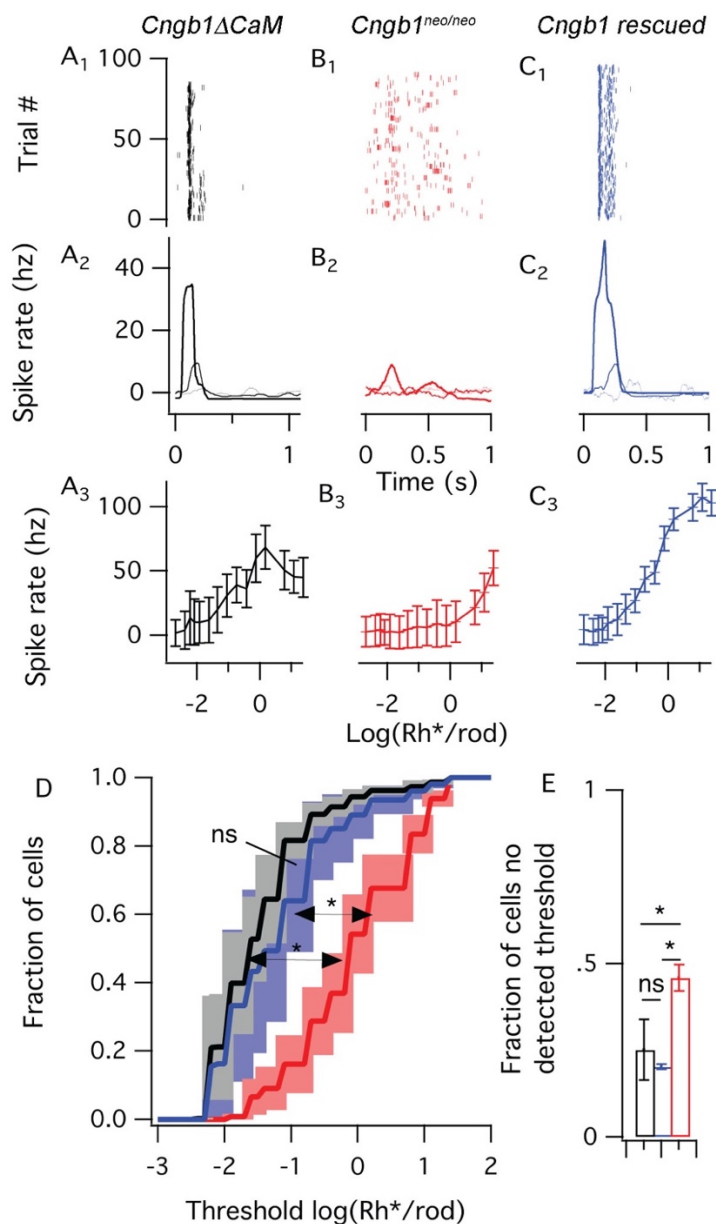

827

828

829 **Figure 7.** Dim flash responses from retinal ganglion cells (RGCs) in whole mount retina show  
 830 recovery from early rod rescue. The top panels (A-C<sub>1</sub>) show spike times of 100 trials of 3  
 831 example cells to a single dim flash (0.75 Rh\*/rod). The middle panels (A-C<sub>2</sub>) shows PSTHs for  
 832 three increasingly bright dim flashes (0.002, 0.02, 0.75, Rh\*/rod). The bottom panels (A-C<sub>3</sub>)  
 833 show the mean spike rate  $\pm$  SD, measured on each trial in a 100 ms window around the peak of  
 834 the PSTH. Dim flash thresholds were estimated from these curves for 1954 cells. The average  
 835 cumulative distribution function show higher thresholds responses in *Cngb1*<sup>neo/neo</sup> mice RGCs  
 836 than *Cngb1* $\Delta$ CaM and tamoxifen-treated *Cngb1*<sup>neo/neo</sup> mice RGCs (D). The shaded regions  
 837 illustrating SEMs across (3-5 experimental preparations). Additionally, flash thresholds could  
 838 not be identified in a larger portion of RGCs from *Cngb1*<sup>neo/neo</sup> mice (E).
